1 **Novel 3,6-Dihydroxypicolinic Acid Decarboxylase Mediated Picolinic Acid**  
2 **Catabolism in *Alcaligenes faecalis* JQ135**

3

4 Jiguo Qiu<sup>1</sup>, Yanting Zhang<sup>1</sup>, Shigang Yao<sup>1</sup>, Hao Ren<sup>2</sup>, Meng Qian<sup>3</sup>, Qing Hong<sup>1</sup>,  
5 Zhenmei Lu<sup>2\*</sup>, and Jian He<sup>1,3 \*</sup>

6

7 <sup>1</sup>Key Laboratory of Agricultural Environmental Microbiology, Ministry of Agriculture, College of  
8 Life Sciences, Nanjing Agricultural University, Nanjing, 210095, China

9 <sup>2</sup>College of Life Sciences, Zhejiang University, Hangzhou, 310058, China

10 <sup>3</sup>Laboratory Centre of Life Science, College of Life Sciences, Nanjing Agricultural University,  
11 Nanjing, 210095, China

12

13 Running Title: Novel 3,6-Dihydroxypicolinic Acid Decarboxylase

14

15 **Keywords:** *Alcaligenes faecalis*, picolinic acid, 3,6-dihydroxypicolinic acid,  
16 degradation, decarboxylase, amidohydrolase\_2

17

18 \* Address correspondence to Jian He, [hejian@njau.edu.cn](mailto:hejian@njau.edu.cn), or Zhenmei Lu,  
19 [lzhenmei@zju.edu.cn](mailto:lzhenmei@zju.edu.cn)

20

21

22 **ABSTRACT**

23 *Alcaligenes faecalis* strain JQ135 utilizes picolinic acid (PA) as sole carbon and  
24 nitrogen source for growth. In this study, we screened a 6-hydroxypicolinic acid  
25 (6HPA) degradation-deficient mutant through random transposon mutagenesis. The  
26 mutant hydroxylated 6HPA into an intermediate, identified as 3,6-dihydroxypicolinic  
27 acid (3,6DHPA) with no further degradation. A novel decarboxylase PicC was  
28 identified that was found to be responsible for the decarboxylation of 3,6DHPA to  
29 2,5-dihydroxypyridine. Although, PicC belonged to amidohydrolase\_2 family, it  
30 shows low similarity (<45%) when compared to other reported amidohydrolase\_2  
31 family decarboxylases. Moreover, PicC was found to form a monophyletic group in  
32 the phylogenetic tree constructed using PicC and related proteins. Further, the genetic  
33 deletion and complementation results demonstrated that *picC* was essential for PA  
34 degradation. The PicC was Zn<sup>2+</sup>-dependent non-oxidative decarboxylase that can  
35 specifically catalyze the irreversible decarboxylation of 3,6DHPA to  
36 2,5-dihydroxypyridine. The  $K_m$  and  $k_{cat}$  towards 3,6DHPA were observed to be 13.44  
37  $\mu\text{M}$  and  $4.77 \text{ s}^{-1}$ , respectively. Site-directed mutagenesis showed that His163 and  
38 His216 were essential for PicC activity.

39

40

41 **IMPORTANCE**

42 Picolinic acid is a natural toxic pyridine derived from L-tryptophan metabolism  
43 and some aromatic compounds in mammalian and microbial cells. Microorganisms  
44 can degrade and utilize picolinic acid for their growth, and thus, a microbial  
45 degradation pathway of picolinic acid has been proposed. Picolinic acid is converted  
46 into 6-hydroxypicolinic acid, 3,6-dihydroxypicolinic acid, and 2,5-dihydroxypyridine  
47 in turn. However, there was no physiological and genetic validation for this pathway.  
48 This study demonstrated that 3,6DHPA was an intermediate in PA catabolism process  
49 and further identified and characterized a novel amidohydrolase\_2 family  
50 decarboxylase PicC. It was also shown that PicC could catalyze the decarboxylation  
51 process of 3,6-dihydroxypicolinic acid into 2,5-dihydroxypyridine. This study  
52 provides a basis for understanding PA degradation pathway and the underlying  
53 molecular mechanism.

54

55

56

57

## 58 INTRODUCTION

59 Decarboxylation is a fundamental process in nature (1, 2). A variety of organic  
60 compounds, including carbohydrates, fatty acids, aromatic compounds, and  
61 environmental xenobiotics, are involved in decarboxylation. The decarboxylase  
62 family can be subdivided into two groups based on the cofactor involved (1). Some  
63 enzymes require organic cofactors, such as flavin or NAD(P)<sup>+</sup>; while others utilize  
64 inorganic cofactors, such as Zn<sup>2+</sup> or Mn<sup>2+</sup>. Recently, the amidohydrolase\_2 family  
65 decarboxylases that use inorganic ions as cofactors, have been gaining more  
66 attentions (3-6). The enzymes in this family are usually involved in the catabolism of  
67 important natural compounds such as  $\alpha$ -amino- $\beta$ -carboxymuconate- $\epsilon$ -semialdehyde  
68 (ACMSD) (7, 8),  $\gamma$ -resorcyate (9), 2,3-dihydroxybenzoate (10),  
69 2,5-dihydroxybenzoate (11), 3,4-dihydroxybenzoate (2), 4-hydroxybenzoate (12),  
70 5-carboxyvanillate (13), vanillate (14), and 2-hydroxy-1-naphthoate (3). However,  
71 most of these studied compounds are benzene ring derivatives, while no  
72 decarboxylase has been studied that is involved in the catabolism of pyridine  
73 derivatives.

74 Picolinic acid (PA) is a typical C2-carboxylated pyridine derivate that is widely  
75 produce from physiological metabolism in mammalian and microbial cells (15). PA is  
76 a natural dead-end metabolite of L-tryptophan produced via kynurenine pathway in  
77 humans and other mammals (16-18). Moreover, it can be produced in other biological  
78 processes such as the microbial degradation of 2-aminophenol, catechol, and  
79 nitrobenzene (19-21). PA was found to be toxic and it inhibited the growth of normal  
80 rat kidney cells and T cell proliferation, thus, enhancing seizure activity in mice, and  
81 inducing cell death via apoptosis (22-25). PA cannot be metabolized by humans, thus  
82 gets excreted through urine or sweat (26). However, PA can be degraded by

83 microorganisms in the natural environment (15). Numerous PA-degrading bacterial  
84 strains have been isolated including *Achromobacter* (27), *Aerococcus* (28),  
85 *Alcaligenes* (29), *Arthrobacter* (30), *Bacillus* (31), *Burkholderia* (32), or *Streptomyces*  
86 (33). The metabolic pathway of PA in microorganisms has been partially elucidated in  
87 previous studies (15, 28, 32) (Fig. 1). In other studies, the crude enzyme facilitating  
88 the conversion of PA to 6HPA has been preliminarily purified in *Arthrobacter*  
89 *picolinophilus* DSM 20665 and an unidentified gram-negative bacterium (designated  
90 as UGN strain) (30, 34). Nevertheless, the functional genes or enzymes involved in  
91 PA degradation has not been cloned or characterized yet.

92 In our previous work, we demonstrated that *Alcaligenes faecalis* strain JQ135  
93 utilizes PA as sole carbon, nitrogen, and an energy source and 6-hydroxypicolinic  
94 acid (6HPA) was the first intermediate of PA.(35). Further studies showed that *maiA*  
95 gene was essential for PA catabolism (36). In the present research, we reported the  
96 fully characterized intermediate compound, 3,6-dihydroxypicolinic acid (3,6DHPA)  
97 (Fig. 1). Further, a novel non-oxidative 3, 6-dihydroxypicolinic acid decarboxylase  
98 gene (*picC*) was cloned from *A. faecalis* strain JQ135, and the respective product was  
99 characterized.

100

101

## 102 **RESULTS**

### 103 **Transposon mutant and identification of the intermediate 3,6DHPA**

104 A library of *A. faecalis* JQ135 mutants incapable of 6HPA utilization was  
105 constructed by random transposon mutagenesis. More than 30 mutants that could not  
106 grow on 6HPA were selected from approximately 10 000 clones and their ability to  
107 convert 6HPA was examined. The concentration of 6HPA was 1 mM and the  
108 inoculum of mutant was set at a final OD<sub>600</sub> of 2.0. HPLC results showed that one  
109 mutant (designated as Mut-H4) could convert 6HPA into a new intermediate with no  
110 further degradation (Fig. 2). After liquid chromatography/time of flight–mass  
111 spectrometry (LC/TOF-MS) analysis, it was found that the molecular ion peak  
112 ([M+H]<sup>+</sup>) of this new intermediate was 156.0295 (Ion Formula, C<sub>6</sub>H<sub>6</sub>NO<sub>4</sub><sup>+</sup>, calculated  
113 molecular weight 156.0297 with -3.2 ppm error), indicating that one oxygen atom was  
114 added to 6HPA (C<sub>6</sub>H<sub>5</sub>NO<sub>3</sub>). According to previously predicted PA degradation  
115 pathway, the intermediate is most likely to be 3,6DHPA (15, 31, 34). In the present  
116 study, 3,6DHPA was chemically synthesized and characterized by UV-visible,  
117 LC/TOF-MS, <sup>1</sup>H NMR and <sup>13</sup>C NMR spectroscopies (Fig. S1 and S2) and HPLC  
118 analysis showed that the retention time of the new intermediate was identical to that  
119 of the synthetic sample of 3,6DHPA (Fig. 2). Thus, this intermediate compound was  
120 identified as 3,6DHPA.

121

### 122 **Screening of the 3,6DHPA decarboxylase gene**

123 The transposon insertion site of mutant Mut-H4 was identified using the genomic  
124 walking method (37). The insertion site of the transposon was located in gene  
125 *AFA\_15145* (genome position 3298929). Gene *AFA\_15145* was a 972 bp length ORF  
126 starting with GTG. *AFA\_15145* exhibited the highest sequence similarities to several

127 non-oxidative decarboxylases such as  $\gamma$ -resorcyate decarboxylase ( $\gamma$ -RSD, 45%  
128 identity) (9), 2,3-dihydroxybenzoate decarboxylase (2,3DHBD, 36% identity) (10),  
129 5-carboxyvanillate decarboxylase (5CVD, 27% identity) (13), and hydroxynaphthoate  
130 decarboxylase (HndA, 22% identity) (3) (Fig. 3). All these decarboxylases belong to  
131 the amidohydrolase\_2 family proteins (COG2159) that contain a triosephosphate  
132 isomerase (TIM)-barrel fold. Based on the phenotype of the mutant Mut-H4 and  
133 bioinformatics analysis, it was predicted that the *AFA\_15145* (designated as *picC*)  
134 encoded the 3,6DHPA decarboxylase.

135

### 136 **Function identification of *picC* gene in PA degradation in *A. faecalis* JQ135**

137 To confirm whether *picC* is involved in PA degradation, a *picC*-deleted mutant  
138 JQ135 $\Delta$ *picC* was constructed. The mutant JQ135 $\Delta$ *picC* lost the ability to grow on PA,  
139 6HPA, or 3,6DHPA. The complementation strain, JQ135 $\Delta$ *picC*/pBBR-*picC*  
140 completely restored the phenotype of growth on PA, 6HPA, and 3,6DHPA. These  
141 results showed that *picC* gene was essential for the degradation of PA in *A. faecalis*  
142 JQ135.

143

### 144 **The *picC* encodes 3,6DHPA decarboxylase**

145 The recombinant PicC was overexpressed in *E. coli* BL21(DE3) cells containing  
146 the plasmid pET-*picC*. SDS/PAGE analysis showed the presence of an intense band,  
147 consistent with the 6 $\times$ His-tagged PicC (37 kDa) (Fig. 4). The degradation of  
148 3,6DHPA by purified PicC was monitored spectrophotometrically. The maximum  
149 absorption was shifted from 340 nm (3,6DHPA) to 320 nm (2,5DHP). LC/TOF-MS  
150 analysis suggested that the molecular ion peak of the product was 112.0400 (M+H<sup>+</sup>),  
151 which was identical to that of 2,5DHP (36, 38). Further, the HPLC analysis showed

152 that the retention time of the product was identical to that of the authentic sample of  
153 2,5DHP. The 3,6DHPA was degraded completely with the formation of equal molar of  
154 2,5DHP. Moreover, the PicC did not catalyze the reverse carboxylation of 2,5DHP in  
155 a reaction mixture containing  $\text{NaHCO}_3$ .

156

### 157 **Biochemical properties of PicC**

158 The recombinant PicC was highly active at pH 7.0 and 40°C (Fig. S3). The  $K_m$   
159 and  $k_{cat}$  values for 3,6DHPA were found to be 13.44  $\mu\text{M}$  and 4.77  $\text{s}^{-1}$ , respectively  
160 (Table 1). The enzyme was unstable at room temperature and could retain only 50%  
161 of initial activity when incubated at 30°C for 24 h. In addition, PicC could not convert  
162 the structural analogues of 3,6DHPA including 3-hydroxy-picolinic acid, gentisic  
163 acid, 2,3-dihydroxybenzoic acid, and 2,6-dihydroxybenzoic acid. This can be  
164 attributed to the substrate specificity of PicC towards 3,6DHPA.

165 The effects of various metal ions and inhibitors, on decarboxylase activity are  
166 presented in Table 2. PicC activity was not affected by metal ions such as  $\text{Ca}^{2+}$ ,  $\text{Cd}^{2+}$ ,  
167  $\text{Co}^{2+}$ ,  $\text{Fe}^{3+}$ ,  $\text{Mg}^{2+}$ ,  $\text{Mn}^{2+}$ , and  $\text{Zn}^{2+}$  but was strongly inhibited by  $\text{Ag}^+$ ,  $\text{Co}^{2+}$ , and  $\text{Hg}^{2+}$   
168 ions. In addition, several inhibitors such as EDTA, 8-hydroxy-quinoline-5-sulfonic  
169 acid (8-HQSA, a zinc metal specific inhibitor), phenylmethylsulfonyl fluoride (PMSF,  
170 serine and cysteine specific inhibitor), and sodium iodoacetate (cysteine specific  
171 inhibitor) showed relatively low effects on PicC activity. However,  
172 diethylpyrocarbonate (DEPC), a histidine residue modifier, strongly inhibited PicC  
173 activity, indicating the presence of active-site histidine residues.

174 Further, absorption spectroscopy analysis revealed the presence of  $\text{Zn}^{2+}$  at  
175  $0.85 \pm 0.1$  mol per mol of protein that is similar to several other non-oxidative  
176 decarboxylases of the amidohydrolase\_2 superfamily (1, 3). The moderate effects,



177 exhibited by additional  $Zn^{2+}$  or EDTA in the reaction system, indicated the presence  
178 of  $Zn^{2+}$  in the center of PicC.

179

### 180 **Site-directed mutagenesis**

181 In order to assess their roles in the function of PicC, seven histidine residues  
182 (H12, H135, H163, H172, H177, H194, and H216) were substituted with Ala residue  
183 through site-directed mutagenesis (Fig. 3B). The seven PicC mutants obtained were  
184 expressed and purified and their activities were determined (Fig. S4; Table 1).  
185 PicC<sup>H135A</sup> showed a slight increase in decarboxylase activity, while PicC<sup>H172A</sup> and  
186 PicC<sup>H194A</sup> showed a slight reduction in decarboxylase activities (10%~50%) and  
187 PicC<sup>H12A</sup> and PicC<sup>H177A</sup> strongly reduced the decarboxylase activities (>90%).  
188 Moreover, the mutant proteins PicC<sup>H163A</sup> and PicC<sup>H216A</sup> completely lost their  
189 decarboxylase activities.

190

## 191 **DISCUSSION**

192 PA is a natural and toxic mono-carboxylated pyridine derivative. The studies on  
193 the microbial degradation mechanism of PA began 50 years ago (28). A partial  
194 catabolic pathway of PA has been proposed (Fig. 1): PA was dehydrogenated to 6HPA,  
195 and then gets converted into 3,6DHPA via hydroxylation leading to the  
196 decarboxylation of 3,6DHPA into 2,5DHP. The intermediate, 6HPA has been  
197 substantially identified in most strains including *Aerococcus* sp. (28), *Alcaligenes*  
198 *faecalis* DSM 6269 (29), *Arthrobacter picolinophilus* DSM 20665 (30, 39),  
199 *Burkholderia* sp. ZD1 (32), *Streptomyces* sp. Z2 (33), and the UGN strain (34).  
200 Further, another intermediate compound, 2,5DHP has been detected in the media  
201 during PA degradation in few strains (32, 34). However, the intermediate 3,6DHPA, a  
202 key link between 6HPA and 2,5DHP, was hardly detectable. This could be most  
203 attributed to its immediate degradation before excreting out of the cells. Previously,  
204 3,6DHPA has only been theoretically proposed in *Bacillus* sp. (31) and the UGN  
205 strain (34). In this study, to the best of our knowledge, we demonstrated the chemical  
206 properties (UV-visible, LC/TOF-MS, <sup>1</sup>H NMR and <sup>13</sup>C NMR spectroscopies) of  
207 3,6DHPA for the first time (Fig. S2) and detected it in the media using the transposon  
208 mutant strain, thus confirming that 3,6DHPA is a catabolic intermediate of PA.

209 Some previous studies have attempted to identify the genes and enzymes  
210 involved in PA degradation, such as the PA dehydrogenase in *Arthrobacter* (39) and  
211 2,5DHP dioxygenase in UGN strain (34). However, their amino acid sequences and  
212 respective coding genes remained unknown, with no biochemical, physiological or  
213 genetic evidence to explain the decarboxylation of 3,6DHPA to 2,5DHP. In this  
214 context, we cloned a decarboxylase gene *picC* through random transposon  
215 mutagenesis, and ascertained that PicC was responsible for 3,6DHPA decarboxylation

216 to form 2,5DHP. We found that PicC shared homology with the amidohydrolase\_2  
217 family proteins and contained the conserved triosephosphate isomerase (TIM)-barrel  
218 fold of amidohydrolase\_2 family (Fig. 3). It has been previously reported that the  
219 amidohydrolase\_2 family protein (PF04909) catalyzes the decarboxylation reaction  
220 (C-C bond) of several benzene derivatives, whereas the amidohydrolase\_1 family  
221 protein (PF01979) catalyzes the hydrolytic reactions (C-N, C-Cl, or C-P bond) (4).  
222 The ACSMD was the first member of amidohydrolase\_2 family to be reported (8)  
223 followed by other members, including  $\gamma$ -RSD (9), 2,3DHBD (10), 5CVD (13), and  
224 HndA (3). A phylogenetic tree of PicC and related proteins showed that PicC was  
225 clustered with amidohydrolase\_2 but not amidohydrolase\_1 family proteins (Fig. 3).  
226 However, the identities between PicC and reported decarboxylases were low (less than  
227 45%), and PicC formed a separate branch in the phylogenetic tree (Fig. 3). In addition,  
228 PicC was found to be specific toward its substrate 3,6DHPA. Thus, it can be  
229 concluded that PicC could be a novel amidohydrolase\_2 family decarboxylase.

230 The amidohydrolase\_2 family proteins contain a few conserved amino acid  
231 residues, which are usually the active sites. In ACSMD, the His177, His228, and  
232 D294 were the  $Zn^{2+}$ -binding sites (4). These three residues have been found in all  
233 reported amidohydrolase\_2 family proteins including PicC (His163, His216, and  
234 D283) (Fig. 3B). In addition, the results of site-directed mutagenesis of PicC  
235 confirmed that H163 and H216 also played essential roles in PicC-mediated catalysis.  
236 Another  $Zn^{2+}$ -binding motif 'HxH' has been found in the N-terminal of ACSMD (4)  
237 and HndA (3), whereas this motif was replaced by 'EEH' in  $\gamma$ -RSD (9) or 'EEA' in  
238 5CVD (13) (Fig. 3B). In PicC, the corresponding motif has been found to be similar  
239 to that of  $\gamma$ -RSD. After substituting His12 by Ala, the resultant enzyme PicC<sup>H12A</sup> still  
240 exhibited 10% activity, suggesting a variation in the third residue of this motif. In

241 addition, site-directed mutagenesis results demonstrated that several other histidine  
242 residues His172, His177, and His194 were important for PicC activity.

243 In conclusion, this study revealed that 3,6DHPA was a catabolic intermediate in  
244 PA degradation by bacteria. The 3,6DHPA decarboxylase (PicC) was identified and  
245 characterized. To the best of our knowledge, PicC is also the first non-oxidative  
246 decarboxylase belonging to the amidohydrolase\_2 family that catalyzes the  
247 irreversible decarboxylation of pyridine derivative. This study will expand our  
248 understanding of the bacterial degradation mechanisms of pyridine derivatives.

249

250

## 251 **MATERIALS AND METHODS**

### 252 **Chemicals**

253 PA, 6HPA, and 2,5DHP were purchased from J&K Scientific Ltd. (Shanghai,  
254 China). EDTA, 8-HQSA, PMSF, sodium iodoacetate, DEPC, and other reagents of  
255 analytical grade were purchased from Sangon Biotech Co., Ltd. (Shanghai, China).  
256 3,6DHPA was chemically synthesized (detailed in the supplemental materials). The  
257 structure of 3,6DHPA was confirmed by UV-visible, LC/TOF-MS, and NMR  
258 spectroscopy (Fig. S1 and S2).

259

### 260 **Strains, plasmids, and primers**

261 All bacterial strains and plasmids used in this study are listed in Table 3.  
262 *Alcaligenes faecalis* JQ135 (CCTCC M 2015812) is the wild-type PA-degrading  
263 strain (35). *E. coli* DH5 $\alpha$  was used as the host for the construction of plasmids. *E. coli*  
264 BL21(DE3) was used to over-express the proteins. Bacteria were cultivated in LB  
265 medium at 37°C (*E. coli*) or 30°C (*Alcaligenes* and their derivatives). Antibiotics were  
266 added at the following concentrations (as required): chloramphenicol (Cm), 34 mg/L;  
267 gentamicin (Gm), 50 mg/L; kanamycin (Km), 50 mg/L; and streptomycin (Str), 50  
268 mg/L. Primer synthesis and the sequencing of PCR products or plasmids were  
269 performed by Genscript Biotech (Nanjing, China) (40). The primers used in this study  
270 are listed in Table 4.

271

### 272 **Transposon mutagenesis, mutant screening, and gene cloning**

273 A transposon mutant library of *A. faecalis* JQ135 was constructed using the  
274 transposon-based plasmid pSC123 (kanamycin-resistance gene) as described  
275 previously (35). In this study, the PA was replaced by its intermediate 6HPA. Mutants

276 that could not utilize 6HPA as the sole carbon source were selected. The flanking  
277 sequences of the transposon in the mutants were amplified using the DNA walking  
278 method (37). The amplified PCR products were sequenced and analyzed. The  
279 insertion sites were confirmed by comparison with the genome sequence of *A. faecalis*  
280 JQ135.

281

## 282 **Gene knockout and genetic complementation of *A. faecalis* JQ135**

283 The genes or DNA fragments from *A. faecalis* JQ135 were amplified by  
284 PCR using corresponding primers (Table 4). The fusion of DNA fragments and cut  
285 plasmids was carried out using the ClonExpress MultiS One Step Cloning Kit  
286 (Vazyme Biotech Co.,Ltd, Nanjing, China). Gene deletion mutant of the *picC* in *A.*  
287 *faecalis* JQ135 was constructed using a two-step homogenetic recombination method  
288 with the suicide plasmid pJQ200SK (41). Two homologous recombination-directing  
289 sequences were amplified using primers, *kopicC*-UF/*kopicC*-UR and  
290 *kopicC*-DF/*kopicC*-DR, respectively. Two PCR fragments were subsequently ligated  
291 into *SacI*/*PstI*-digested pJQ200SK generating pJQ- $\Delta$ *picC*. The pJQ-*picC* plasmid  
292 was then introduced into *A. faecalis* JQ135 cells. The single-crossover mutants were  
293 screened on a LB plate containing Str and Gm. The gentamicin-resistant strains were  
294 then subjected to repeated cultivation in LB medium containing 10% sucrose with no  
295 gentamicin. The double-crossover mutants that lost their plasmid backbone and were  
296 sensitive to gentamicin, were selected on LB Str plates. Deletion of the *picC* gene was  
297 confirmed by PCR. This procedure resulted in the construction of the deletion mutant  
298 strain JQ135 $\Delta$ *picC*.

299 Knockout mutants were complemented as follows. The intact *picC* gene was  
300 amplified using the primers *picC*-F and *picC*-R, and then ligated with the

301 XhoI/HindIII-digested pBBR1-MCS5, generating pBBR-*picC*. The pBBR-*picC* was  
302 then transferred into the mutant strain JQ135 $\Delta$ *picC* to generate the complemented  
303 strain JQ135 $\Delta$ *picC*/pBBR-*picC*.

304

### 305 **Expression and Purification of the His-tagged PicC and its mutations**

306 For the over-expression of *picC* gene in *E. coli* BL21(DE3), the complete ORF  
307 without the stop codon (genome position 3298274-3299242) were amplified using  
308 genomic DNA of strain JQ135 and inserted into the NdeI/XhoI-digested plasmid  
309 pET29a(+), resulting in the plasmid pET-PicC. *E. coli* BL21(DE3) cells (containing  
310 pET-PicC) were initiated by the addition of 0.3 mM IPTG when the optical density of  
311 the culture (OD<sub>600</sub>) reached 0.5-0.8 and was incubated for an additional 12 h at 16°C..  
312 Cells were harvested by centrifugation at 4 °C, sonicated, and then centrifuged again  
313 to remove cell debris. The supernatant was used for recombinant protein purification  
314 using Ni-NTA agarose column (Sangon, Shanghai, China). The purified 6 ×  
315 His-tagged protein were then analyzed using 12.5% SDS-PAGE. The protein  
316 concentrations were determined using the Bradford method (42).

317 For site-directed mutagenesis of PicC, the *picC* fragments were amplified from  
318 plasmid pET-PicC through overlap PCR using the primers carrying point mutations  
319 (Table 4). Amplified fragments were fused into plasmid pET29a(+), resulting in  
320 pET-PicC<sup>H12A</sup>, pET-PicC<sup>H135A</sup>, pET-PicC<sup>H163A</sup>, pET-PicC<sup>H172A</sup>, pET-PicC<sup>H177A</sup>,  
321 pET-PicC<sup>H194A</sup>, and pET-PicC<sup>H216A</sup>. Resultant constructs were confirmed by  
322 sequencing. The expression and purification of the mutations were performed as  
323 described in the section above.

324

325

## 326 **Enzymatic assays of 3,6DHPA decarboxylase**

327 For the decarboxylase activity, enzyme reaction mixture contained 50 mM PBS  
328 (pH 7.0), 0.3 mM 3,6DHPA, and 5  $\mu$ g purified PicC (in 1 mL) and incubated at 40°C.  
329 The enzymatic activities were determined spectrophotometrically by the disappearance  
330 of 3,6DHPA at 360 nm ( $\epsilon=4.4 \text{ cm}^{-1} \text{ mM}^{-1}$ ). To determine the effect of one condition,  
331 other conditions were kept at fixed concentration of the standard reaction. The  
332 optimum pH of the PicC protein was determined using various buffers such as 50 mM  
333 citric acid-sodium citrate (pH 4 to 6), 50 mM  $\text{KH}_2\text{PO}_4\text{-K}_2\text{HPO}_4$  (pH 6 to 8), and 50 mM  
334 glycine-NaOH (pH 8.0 to 9.8) at 40°C. The optimum temperature of the PicC protein  
335 was determined to be in between 10°C to 50°C in PBS (pH 7.0). Purified PicC was  
336 pre-incubated with various metal ions and inhibitors at 4°C for 30 min to study their  
337 effects on the enzyme. The activity was expressed as a percentage of the activity  
338 obtained in the absence of the added compound. To determine the kinetic constants for  
339 3,6DHPA, a range of 3,6DHPA concentrations (2 to 150  $\mu$ M) were used. The values  
340 were calculated through non-linear regression fitting to the Michaelis-Menten equation.  
341 One unit of the activity was defined as the amount of enzyme that catalyzed 1  $\mu$ mol of  
342 3,6DHPA in 1 min.

343 The measurement of carboxylase activity of PicC was similar with a previous  
344 study (43). The reaction mixture contained 50 mM PBS (pH 7.0), 0.3 mM 2,5DHP, 5.0  
345 mM  $\text{NaHCO}_3$  and 5  $\mu$ g purified PicC in 1 mL mixture at 40 °C.

346

## 347 **Analytical methods**

348 The UV-VIS spectra was observed by a UV2450 spectrophotometer (Shimadzu).  
349 The determination of PA and 6HPA, 3,6DHPA, and 2,5DHP concentrations were  
350 performed by HPLC analysis on a Shimadzu AD20 system equipped with a Phecda



351 C18 reversed phase column (250 mm × 4.60 mm, 5 μm). The concentrations of the  
352 compounds were calculated using standard samples. The mobile phase was consisted  
353 of methanol : water : formic acid (12.5:87.5:0.2, v/v/v) at a flow rate of 0.6 mL/min,  
354 at 30 °C. LC/TOF-MS analysis was performed in a TripleTOF 5600 (AB SCIEX)  
355 mass spectrometer, as described previously (44). The Zn<sup>2+</sup> concentration in the PicC  
356 protein was analyzed using inductively coupled plasma optical emission spectrometry  
357 (ICP-OES) according to a previous study (45).

358

### 359 **Nucleotide sequence accession numbers**

360 The PicC and the complete genome sequence of *A. faecalis* JQ135 have been  
361 deposited in the GenBank database under accession numbers [ARS01287](#) and  
362 [CP021641](#), respectively.

363

364

## 365 Acknowledgments

366 We thank Dr. Chensi Shen (Donghua University) for the help of 3,6DHPA  
367 synthesis and MogoEdit Co. for providing linguistic assistance during the preparation  
368 of the manuscript.

369 This work was supported by the State's Key Project of Research and  
370 Development Plan (2016YFD0801102), the National Natural Science Foundation of  
371 China (Nos. 41630637, 31870092, and 31770117).

372

## 373 Conflict of interest

374 The authors declare no conflict of interest.

375

## 376 References

377

- 378 1. **Li T, Huo L, Pulley C, Liu A.** 2012. Decarboxylation mechanisms in biological system.  
379 *Bioorg Chem* **43**:2-14.
- 380 2. **He Z, Wiegel J.** 1996. Purification and characterization of an oxygen-sensitive, reversible 3,  
381 4-dihydroxybenzoate decarboxylase from *Clostridium hydroxybenzoicum*. *J Bacteriol*  
382 **178**:3539-3543.
- 383 3. **Chowdhury PP, Basu S, Dutta A, Dutta TK.** 2016. Functional characterization of a novel  
384 member of the amidohydrolase 2 protein family, 2-hydroxy-1-naphthoic acid nonoxidative  
385 decarboxylase from *Burkholderia* sp. strain BC1. *J Bacteriol* **198**:1755-1763.
- 386 4. **Liu A, Zhang H.** 2006. Transition metal-catalyzed nonoxidative decarboxylation reactions.  
387 *Biochemistry* **45**:10407-10411.
- 388 5. **Xu S, Li W, Zhu J, Wang R, Li Z, Xu GL, Ding J.** 2013. Crystal structures of isoorotate  
389 decarboxylases reveal a novel catalytic mechanism of 5-carboxyl-uracil decarboxylation and  
390 shed light on the search for DNA decarboxylase. *Cell Res* **23**:1296.
- 391 6. **Seibert CM, Raushel FM.** 2005. Structural and catalytic diversity within the amidohydrolase  
392 superfamily. *Biochemistry* **44**:6383.
- 393 7. **Li T, Walker AL, Iwaki H, Hasegawa Y, Liu A.** 2005. Kinetic and spectroscopic  
394 characterization of ACMSD from *Pseudomonas fluorescens* reveals a pentacoordinate  
395 mononuclear metalocofactor. *J Am Chem Soc* **127**:12282-12290.
- 396 8. **Li T, Iwaki H, Fu R, Hasegawa Y, Zhang H, Liu A.** 2006.  
397 Alpha-amino-beta-carboxymuconic-epsilon-semialdehyde decarboxylase (ACMSD) is a new  
398 member of the amidohydrolase superfamily. *Biochemistry* **45**:6628-6634.
- 399 9. **Yoshida M, Fukuhara N, Oikawa T.** 2004. Thermophilic, reversible  $\gamma$ -resorcyate  
400 decarboxylase from *Rhizobium* sp. strain MTP-10005: purification, molecular characterization,  
401 and expression. *J Bacteriol* **186**:6855-6863.
- 402 10. **Santha R, Rao NA, Vaidyanathan C.** 1996. Identification of the active-site peptide of 2,  
403 3-dihydroxybenzoic acid decarboxylase from *Aspergillus oryzae*. *Biochim Biophys Acta*  
404 **1293**:191-200.
- 405 11. **Grant D, Patel J.** 1969. The non-oxidative decarboxylation of *p*-hydroxybenzoic acid, gentisic  
406 acid, protocatechuic acid and gallic acid by *Klebsiella aerogenes* (*Aerobacter aerogenes*).

- 407 Antonie van Leeuwenhoek **35**:325-343.
- 408 12. **Huang J, Wiegel J.** 1999. Cloning, characterization, and expression of a novel gene encoding a  
409 reversible 4-hydroxybenzoate decarboxylase from *Clostridium hydroxybenzoicum*. *J Bacteriol*  
410 **181**:5119-5122.
- 411 13. **Peng X, Masai E, Kitayama H, Harada K, Katayama Y, Fukuda M.** 2002. Characterization  
412 of the 5-carboxyvanillate decarboxylase gene and its role in lignin-related biphenyl catabolism  
413 in *Sphingomonas paucimobilis* SYK-6. *Appl Environ Microbiol* **68**:4407-4415.
- 414 14. **Chow KT, Pope MK, Davies J.** 1999. Characterization of a vanillic acid non-oxidative  
415 decarboxylation gene cluster from *Streptomyces* sp. D7. *Microbiology* **145**:2393-2403.
- 416 15. **Kaiser J-P, Feng Y, Bollag J-M.** 1996. Microbial metabolism of pyridine, quinoline, acridine,  
417 and their derivatives under aerobic and anaerobic conditions. *Microbiol Rev* **60**:483-498.
- 418 16. **Heyes MP, Eugene O, Saito K.** 1997. Different kynurenine pathway enzymes limit quinolinic  
419 acid formation by various human cell types. *Biochem J* **326**:351-356.
- 420 17. **Bryleva EY, Brundin L.** 2017. Kynurenine pathway metabolites and suicidality.  
421 *Neuropharmacology* **112**:324-330.
- 422 18. **Esquivel DG, Ramirez-Ortega D, Pineda B, Castro N, Rios C, de la Cruz VP.** 2017.  
423 Kynurenine pathway metabolites and enzymes involved in redox reactions.  
424 *Neuropharmacology* **112**:331-345.
- 425 19. **Asano Y, Yamamoto Y, Yamada H.** 1994. Catechol 2, 3-dioxygenase-catalyzed synthesis of  
426 picolinic acids from catechols. *Biosci Biotechnol Biochem* **58**:2054-2056.
- 427 20. **Chirino B, Strahsburger E, Agullo L, Gonzalez M, Seeger M.** 2013. Genomic and functional  
428 analyses of the 2-aminophenol catabolic pathway and partial conversion of its substrate into  
429 picolinic acid in *Burkholderia xenovorans* LB400. *Plos One* **8**:e75746.
- 430 21. **Nishino SF, Spain JC.** 1993. Degradation of nitrobenzene by a *Pseudomonas*  
431 *pseudoalcaligenes*. *Appl Environ Microbiol* **59**:2520-2525.
- 432 22. **Ogata S, Inoue K, Iwata K, Okumura K, Taguchi H.** 2001. Apoptosis induced by picolinic  
433 acid-related compounds in HL-60 cells. *Biosci Biotechnol Biochem* **65**:2337-2339.
- 434 23. **Cioczek-Czuczwar A, Czuczwar P, Turski WA, Parada-Turska J.** 2016. Influence of  
435 picolinic acid on seizure susceptibility in mice. *Pharmacol Rep* **69**:77-80.
- 436 24. **Prodinger J, Loacker LJ, Schmidt RL, Ratzinger F, Greiner G, Witzeneder N, Hoermann  
437 G, Jutz S, Pickl WF, Steinberger P.** 2015. The tryptophan metabolite picolinic acid suppresses  
438 proliferation and metabolic activity of CD4+ T cells and inhibits c-Myc activation. *J Leukocyte*  
439 *Biol* **99**:429-431.
- 440 25. **Lovelace MD, Varney B, Sundaram G, Lennon MJ, Lim CK, Jacobs K, Guillemin GJ,  
441 Brew BJ.** 2017. Recent evidence for an expanded role of the kynurenine pathway of tryptophan  
442 metabolism in neurological diseases. *Neuropharmacology* **112**:373-388.
- 443 26. **Smythe GA, Poljak A, Bustamante S, Braga O, Maxwell A, Grant R, Sachdev P.** 2003.  
444 ECNI GC-MS analysis of picolinic and quinolinic acids and their amides in human plasma,  
445 CSF, and brain tissue, p. 705-712, *Developments in Tryptophan and Serotonin Metabolism*.  
446 Springer.
- 447 27. **Kutanovas S, Karvelis L, Vaitekūnas J, Stankevičiūtė J, Gasparavičiūtė R, Meškys R.**  
448 2016. Isolation and characterization of novel pyridine dicarboxylic acid-degrading  
449 microorganisms. *Chemija* **27**:74-83.
- 450 28. **Dagley S, Johnson PA.** 1963. Microbial oxidation of kynurenic, xanthurenic and picolinic  
451 acids. *Biochim Biophys Acta* **78**:577-587.
- 452 29. **Kiener A, Glöckler R, Heinzmann K.** 1993. Preparation of 6-oxo-1,  
453 6-dihydropyridine-2-carboxylic acid by microbial hydroxylation of pyridine-2-carboxylic acid.  
454 *J Chem Soc Perk T* **1**:1201-1202.
- 455 30. **Siegmund I, Koenig K, Andreesen JR.** 1990. Molybdenum involvement in aerobic  
456 degradation of picolinic acid by *Arthrobacter picolinophilus*. *FEMS Microbiol Lett*  
457 **67**:281-284.
- 458 31. **Shukla OP, Kaul SM.** 1973. Microbial transformation of alpha-picolinate by *Bacillus* sp.  
459 *Indian J Biochem Bioph* **10**:176.
- 460 32. **Zheng C, Wang Q, Ning Y, Fan Y, Feng S, He C, Zhang TC, Shen Z.** 2017. Isolation of a  
461 2-picolinic acid-assimilating bacterium and its proposed degradation pathway. *Bioresour*  
462 *Technol* **245**:681-688.
- 463 33. **Zheng C, Zhou J, Wang J, Qu B, Lu H, Zhao H.** 2009. Aerobic degradation of 2-picolinic  
464 acid by a nitrobenzene-assimilating strain *Streptomyces* sp. Z2. *Bioresour Technol*  
465 **100**:2082-2084.
- 466 34. **Orpin CG, Knight M, Evans WC.** 1972. The bacterial oxidation of picolinamide, a photolytic

- 467 product of Diquat. *Biochem J* **127**:819-831.
- 468 35. **Qiu J, Zhang J, Zhang Y, Wang Y, Tong L, Hong Q, He J.** 2017. Biodegradation of picolinic  
469 acid by a newly isolated bacterium *Alcaligenes faecalis* strain JQ135. *Curr Microbiol*  
470 **74**:508-514.
- 471 36. **Qiu J, Liu B, Zhao L, Zhang Y, Cheng D, Yan X, Jiang J, Hong Q, He J.** 2018. A novel  
472 degradation mechanism for pyridine derivatives in *Alcaligenes faecalis* JQ135. *Appl Environ*  
473 *Microbiol* **84**:e00910-00918.
- 474 37. **Wang S, He J, Cui Z, Li S.** 2007. Self-formed adaptor PCR: a simple and efficient method for  
475 chromosome walking. *Appl Environ Microbiol* **73**:15-21.
- 476 38. **Yu H, Tang H, Zhu X, Li Y, Xu P.** 2015. Molecular mechanism of nicotine degradation by a  
477 newly isolated strain *Ochrobactrum* sp. strain SJY1. *Appl Environ Microbiol* **81**:272-281.
- 478 39. **Tate RL, Ensign JC.** 1974. Picolinic acid hydroxylase of *Arthrobacter picolinophilus*. *Can J*  
479 *Microbiol* **20**:695-702.
- 480 40. **Wang GL, Li R, Li SP, Jiang JD.** 2010. A novel hydrolytic dehalogenase for the chlorinated  
481 aromatic compound chlorothalonil. *J Bacteriol* **192**:2737-2745.
- 482 41. **Quandt J, Hynes M.** 1993. Versatile suicide vectors which allow direct selection for gene  
483 replacement in gram-negative bacteria. *Gene* **127**:15-21.
- 484 42. **Bradford MM.** 1976. A rapid and sensitive method for the quantitation of microgram  
485 quantities of protein utilizing the principle of protein-dye binding. *Anal Biochem* **72**:248-254.
- 486 43. **Pezzella A, Capelli L, Costantini A, Luciani G, Tescione F, Silvestri B, Vitiello G, Branda**  
487 **F.** 1998. Purification and characterization of gallic acid decarboxylase from *Pantoea*  
488 *agglomerans* T71. *Appl Environ Microbiol* **64**:4743-4747.
- 489 44. **Yang Z, Jiang W, Wang X, Cheng T, Zhang D, Wang H, Qiu J, Cao L, Wang X, Hong Q.**  
490 2018. An amidase gene *ipaH* is responsible for the initial degradation step of iprodione in strain  
491 *Paenarthrobacter* sp. YJN-5. *Appl Environ Microbiol* **84**:e01150-01118.
- 492 45. **Wang X, Nie Z, He L, Wang Q, Sheng X.** 2017. Isolation of As-tolerant bacteria and their  
493 potentials of reducing As and Cd accumulation of edible tissues of vegetables in  
494 metal(loid)-contaminated soils. *Sci Total Environ* **579**:179-189.
- 495

496

497

498 **Figure legends**

499 Fig. 1 Proposed PA degradation pathway in *A. faecalis* JQ135. The 3,6DHPA and  
500 2,5-DHP are shown in blue color. TCA, tricarboxylic acid cycle.

501 Fig. 2 HPLC and LC/TOF-MS profiles of the conversion of 6HPA by mutant  
502 Mut-H4. (A and C) the authentic sample of 6HPA and 3,6DHPA, respectively. (B) The  
503 conversion of 6HPA into 3,6DHPA by mutant Mut-H4. The detection wavelength was  
504 set at 310 nm. (D) LC/TOF-MS spectra of 3,6DHPA produced in panel B.

505 Fig. 3 Amino acid sequence analysis of PicC. (A) Phylogenetic analysis of PicC  
506 and related decarboxylases. Each item was arranged in the following order: protein  
507 name, accession number, and strain. AmiH\_1 and \_2 are amidohydrolase\_1 and \_2  
508 family, respectively. The phylogenetic tree was constructed using the neighbor-joining  
509 method (with a bootstrap of 1000) with software MEGA 6.0. The bar represents amino  
510 acid substitutions per site. (B) Multiple sequence alignment of PicC and seven  
511 decarboxylases. The predicted N-terminal motifs for Zn<sup>2+</sup> binding are denoted by blue  
512 box. The other three Zn<sup>2+</sup>-binding sites are denoted by purple diamonds. The seven  
513 histidine residues for site-directed mutagenesis are denoted by blue triangles.

514 Fig. 4 Characterization of PicC. (A) SDS-PAGE of purified PicC. Lane M,  
515 protein marker. Lane 1, purified PicC. (B) Spectrophotometric changes during  
516 transformation of 3,6DHPA by purified PicC. The reaction was initiated by adding  
517 3,6DHPA. Spectra were recorded every 1 min. The arrow denotes the  
518 biotransformation of 3,6DHPA into 2,5DHP. (C) HPLC analysis of the transformation  
519 of 3,6DHPA into 2,5DHP by PicC. The detection wavelength was 310 nm.

520

521 **Tables**

522

523

524 **Table 1 Kinetic constants of wild-type PicC and mutants.**

525

| Enzyme                | $K_m$<br>( $\mu\text{M}$ ) | $V_{\text{max}}$<br>( $\mu\text{mol min}^{-1} \text{mg}^{-1}$ ) | $k_{\text{cat}}$<br>( $\text{s}^{-1}$ ) | $k_{\text{cat}}/K_m$<br>( $\text{s}^{-1} \text{mM}^{-1}$ ) |
|-----------------------|----------------------------|-----------------------------------------------------------------|-----------------------------------------|------------------------------------------------------------|
| PicC                  | $13.44 \pm 2.91$           | $7.73 \pm 0.05$                                                 | 4.77                                    | 354.54                                                     |
| PicC <sup>H12A</sup>  | $53.06 \pm 4.05$           | $2.83 \pm 0.09$                                                 | 1.75                                    | 32.94                                                      |
| PicC <sup>H135A</sup> | $9.38 \pm 0.68$            | $6.14 \pm 0.11$                                                 | 3.78                                    | 403.40                                                     |
| PicC <sup>H163A</sup> | ND                         | ND                                                              | ND                                      | ND                                                         |
| PicC <sup>H172A</sup> | $15.80 \pm 1.21$           | $3.33 \pm 0.08$                                                 | 2.06                                    | 130.14                                                     |
| PicC <sup>H177A</sup> | $110.81 \pm 14.70$         | $2.18 \pm 0.01$                                                 | 1.35                                    | 12.14                                                      |
| PicC <sup>H194A</sup> | $11.38 \pm 0.64$           | $5.15 \pm 0.07$                                                 | 3.18                                    | 279.05                                                     |
| PicC <sup>H216A</sup> | ND                         | ND                                                              | ND                                      | ND                                                         |

526 ND: not detected

527

528

529

530 **Table 2 Effect of metal ions and inhibitors on PicC activity.**

531

| ions/inhibitor    | Relative activity (%)* | ions/inhibitor     | Relative activity (%) |
|-------------------|------------------------|--------------------|-----------------------|
| BLANK             | 100                    | AgNO <sub>3</sub>  | 4.63 ± 0.53           |
| CaCl <sub>2</sub> | 90.68 ± 1.49           | CdCl <sub>2</sub>  | 99.98 ± 2.43          |
| CoCl <sub>2</sub> | 84.47 ± 2.21           | CuCl <sub>2</sub>  | 23.89 ± 0.67          |
| FeCl <sub>3</sub> | 97.59 ± 1.44           | HgCl <sub>2</sub>  | 2.36 ± 0.40           |
| MgSO <sub>4</sub> | 87.59 ± 1.95           | MnSO <sub>4</sub>  | 91.30 ± 1.13          |
| ZnSO <sub>4</sub> | 97.11 ± 1.84           | DEPC               | 4.05 ± 0.19           |
| EDTA              | 60.94 ± 1.64           | 8-HQSA             | 55.21 ± 0.91          |
| PMSF              | 97.27 ± 0.32           | Sodium iodoacetate | 81.68 ± 0.99          |

532 \* Metal ions were tested at 0.1 mM. DEPC: 0.1%. PMSF: 1%. Sodium iodoacetate: 0.025 mM.  
533 8-HQSA: 100 µg/mL. EDTA: 100 µg/mL.

534

535

536

537 **Table 3 Strains and plasmids used in this study.**

538

| Strains or plasmids                   | Description                                                                                                                     | Source          |
|---------------------------------------|---------------------------------------------------------------------------------------------------------------------------------|-----------------|
| <i>Alcaligenes faecalis</i> strains   |                                                                                                                                 |                 |
| JQ135                                 | Str <sup>r</sup> ; PA-degrading bacterium. Gram-negative. Wild type.                                                            | CCTCC M 2015812 |
| Mut-H4                                | Str <sup>r</sup> , Km <sup>r</sup> ; <i>picC</i> ( <i>AFA_15145</i> ) mutant of <i>A. faecalis</i> JQ135 inserted by transposon | This study      |
| JQ135Δ <i>picC</i>                    | Str <sup>r</sup> ; <i>picC</i> -deletion mutant of JQ135                                                                        | This study      |
| JQ135Δ <i>picC</i> /pBBR- <i>picC</i> | Str <sup>r</sup> , Gm <sup>r</sup> ; JQ135Δ <i>picC</i> complementation with pBBR- <i>picC</i>                                  | This study      |
| <i>E. coli</i> strains                |                                                                                                                                 |                 |
| DH5α                                  | F <sup>-</sup> <i>recA1 endA1 thi-1 hsdR17 supE44 relA1 deoRA(lacZYA-argF) U169 φ80lacZ ΔM15</i>                                | TaKaRa          |
| BL21(DE3)                             | F <sup>-</sup> <i>ompT hsdS(rB<sup>-</sup> mB<sup>-</sup>) gal dcm lacY1(DE3)</i>                                               | TaKaRa          |
| SM10 <sub>pir</sub>                   | Donor strain for biparental mating                                                                                              | Lab stock       |
| Plasmids                              |                                                                                                                                 |                 |
| pET29a(+)                             | Km <sup>r</sup> , expression plasmid                                                                                            | Novagen         |
| pSC123                                | Cm <sup>r</sup> , Km <sup>r</sup> ; suicide plasmid, mariner transposon                                                         | Lab stock       |
| pJQ200SK                              | Gm <sup>r</sup> , mob <sup>+</sup> , <i>oriP15A</i> , <i>lacZα<sup>+</sup></i> , <i>sacB</i> ; suicide plasmid                  | Lab stock       |
| pBBR1MCS-5                            | Gm <sup>r</sup> ; broad-host-range cloning plasmid                                                                              | Lab stock       |
| pJQ-Δ <i>picC</i>                     | Gm <sup>r</sup> ; <i>picC</i> gene deletion plasmid                                                                             | This study      |
| pBBR- <i>picC</i>                     | Gm <sup>r</sup> ; the fragment containing the <i>picC</i> gene inserted into XhoI/HindIII-digested pBBR1MCS-5                   | This study      |
| pET-PicC                              | Km <sup>r</sup> ; <i>NdeI-XhoI</i> fragment containing <i>picC</i> gene inserted into pET29a(+)                                 | This study      |
| pET-PicC <sup>H12A</sup>              | Km <sup>r</sup> ; <i>NdeI-XhoI</i> fragment containing <i>picC</i> <sup>H12A</sup> gene inserted into pET29a(+)                 | This study      |
| pET-PicC <sup>H135A</sup>             | Km <sup>r</sup> ; <i>NdeI-XhoI</i> fragment containing <i>picC</i> <sup>H135A</sup> gene inserted into pET29a(+)                | This study      |
| pET-PicC <sup>H163A</sup>             | Km <sup>r</sup> ; <i>NdeI-XhoI</i> fragment containing <i>picC</i> <sup>H163A</sup> gene inserted into pET29a(+)                | This study      |
| pET-PicC <sup>H172A</sup>             | Km <sup>r</sup> ; <i>NdeI-XhoI</i> fragment containing <i>picC</i> <sup>H172A</sup> gene inserted into pET29a(+)                | This study      |
| pET-PicC <sup>H177A</sup>             | Km <sup>r</sup> ; <i>NdeI-XhoI</i> fragment containing <i>picC</i> <sup>H177A</sup> gene inserted into pET29a(+)                | This study      |
| pET-PicC <sup>H194A</sup>             | Km <sup>r</sup> ; <i>NdeI-XhoI</i> fragment containing <i>picC</i> <sup>H194A</sup> gene inserted into pET29a(+)                | This study      |
| pET-PicC <sup>H216A</sup>             | Km <sup>r</sup> ; <i>NdeI-XhoI</i> fragment containing <i>picC</i> <sup>H216A</sup> gene inserted into pET29a(+)                | This study      |

539

540

541



542 **Table 4 Primers used in this study.**

543

| Primers           | Sequence(5'-3')                                      | Description                                    |
|-------------------|------------------------------------------------------|------------------------------------------------|
| <i>kopicC</i> -UF | AGCTTGATATCGAATTCCTGCAGTTCTTCTTGCTTTAGCTCGGC         | To construct plasmid pJQ- <i>ΔpicC</i>         |
| <i>kopicC</i> -UR | TCTAGAACTAGTGGATCCAGTCTGCGACAGCAGCAGTAC              |                                                |
| <i>kopicC</i> -DF | GGATCCACTAGTTCTAGAGTGTGTCTCGGTGGACTACC               |                                                |
| <i>kopicC</i> -DR | AGGGAACAAAAGCTGGAGCTCAGAAGGCGCGCATATCCTCAG           |                                                |
| <i>picC</i> -F    | CAGGAATTCGATATCAAGCTTAGTGGCTTTCAGCCTGTTGCC           | To construct plasmid pBBR- <i>picC</i>         |
| <i>picC</i> -R    | GGTACCGGGCCCCCTCGAGGTAATGCTGACGAATGCCATTGG           |                                                |
| expPicC-F         | CTTTAAGAAGGAGATATACATATGAAACGTATTAATAAAATAGC         | To construct plasmid pET-PicC                  |
| expPicC-R         | GTGGTGGTGGTGGTGGTGCCTCGAGGCTCCGGTCCAGCTTGAACAG       |                                                |
| Mut-H12A-1        | CTTTAAGAAGGAGATATACATATGAAACGTATTAATAAAATAGCACTGGAGG | To construct plasmid pET-PicC <sup>H12A</sup>  |
| Mut-H12A-2        | AAAAAATAGCACTGGAGGAGGCATTCAACGCCGTTGG                |                                                |
| Mut-H12A-3        | TCAGTGGTGGTGGTGGTGGTGCCTCGAGGCTCCGGTCCAGCTTGAACAG    |                                                |
| Mut-H135A-1       | GCTTTGGTCAACGGTGCTACGCATGGTGTGTAC                    | To construct plasmid pET-PicC <sup>H135A</sup> |
| Mut-H135A-2       | GTACACACCATGCGTAGCACCGTTGACCAAAGC                    |                                                |
| Mut-H163A-1       | GTGCCGTTCTATCTGGCTCCCTTTGATGCTTACG                   | To construct plasmid pET-PicC <sup>H163A</sup> |
| Mut-H163A-2       | CGTAAGCATCAAAGGAGCCAGATAGAACGGCAC                    |                                                |
| Mut-H172A-1       | GCTTACGAAATGCCAGCTGCTTACACAGGCCAC                    | To construct plasmid pET-PicC <sup>H172A</sup> |
| Mut-H172A-2       | GTGGCCTGTGTAAGCAGCTGGCATTTCGTAAGC                    |                                                |
| Mut-H177A-1       | CACGCTTACACAGGCGCTCCGGAGCTGGTTGGG                    | To construct plasmid pET-PicC <sup>H177A</sup> |
| Mut-H177A-2       | CCCAACCAGCTCCGGAGCGCCTGTGTAAGCGTG                    |                                                |
| Mut-H194A-1       | GTAGAAACCGGCACCGCAGCGCTGCGCATGTTG                    | To construct plasmid pET-PicC <sup>H194A</sup> |
| Mut-H194A-2       | CAACATGCGCAGCGCTGCGGTGCCGGTTTCTAC                    |                                                |
| Mut-H216A-1       | AAGCTGGTGTGGGTGCAATGGGTGAAGGCCCTG                    | To construct plasmid pET-PicC <sup>H216A</sup> |
| Mut-H216A-2       | CAGGCCTCACCCATTGCACCCAGCACCAGCTT                     |                                                |

544

545

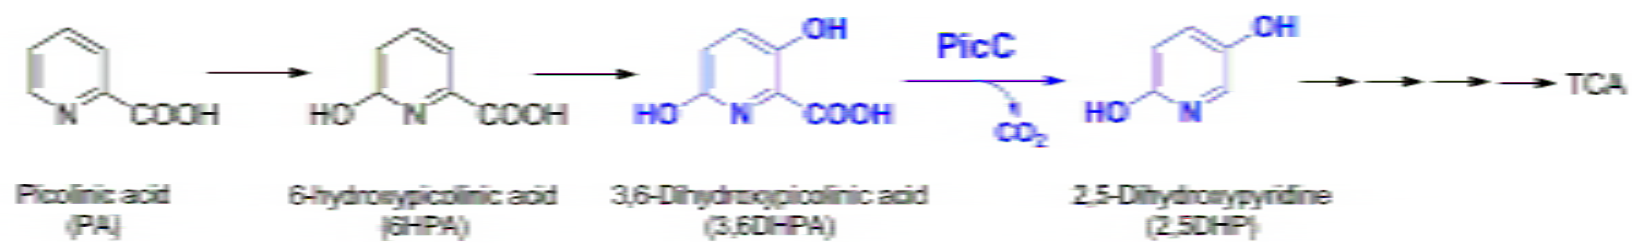

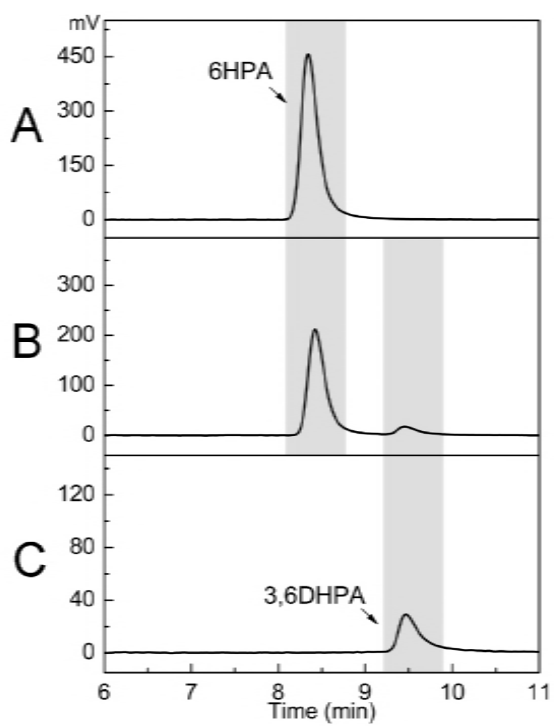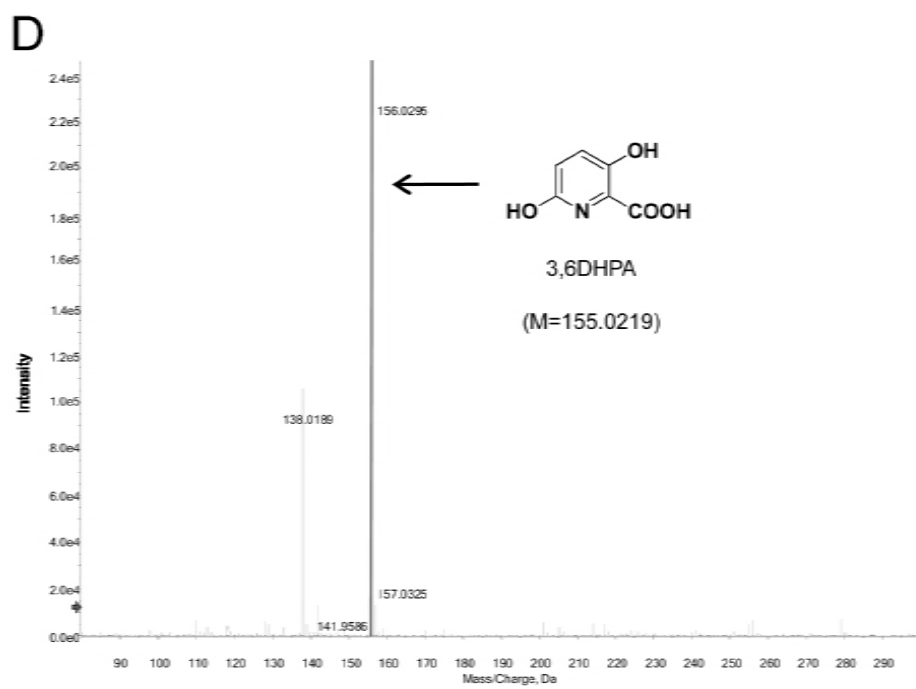

A

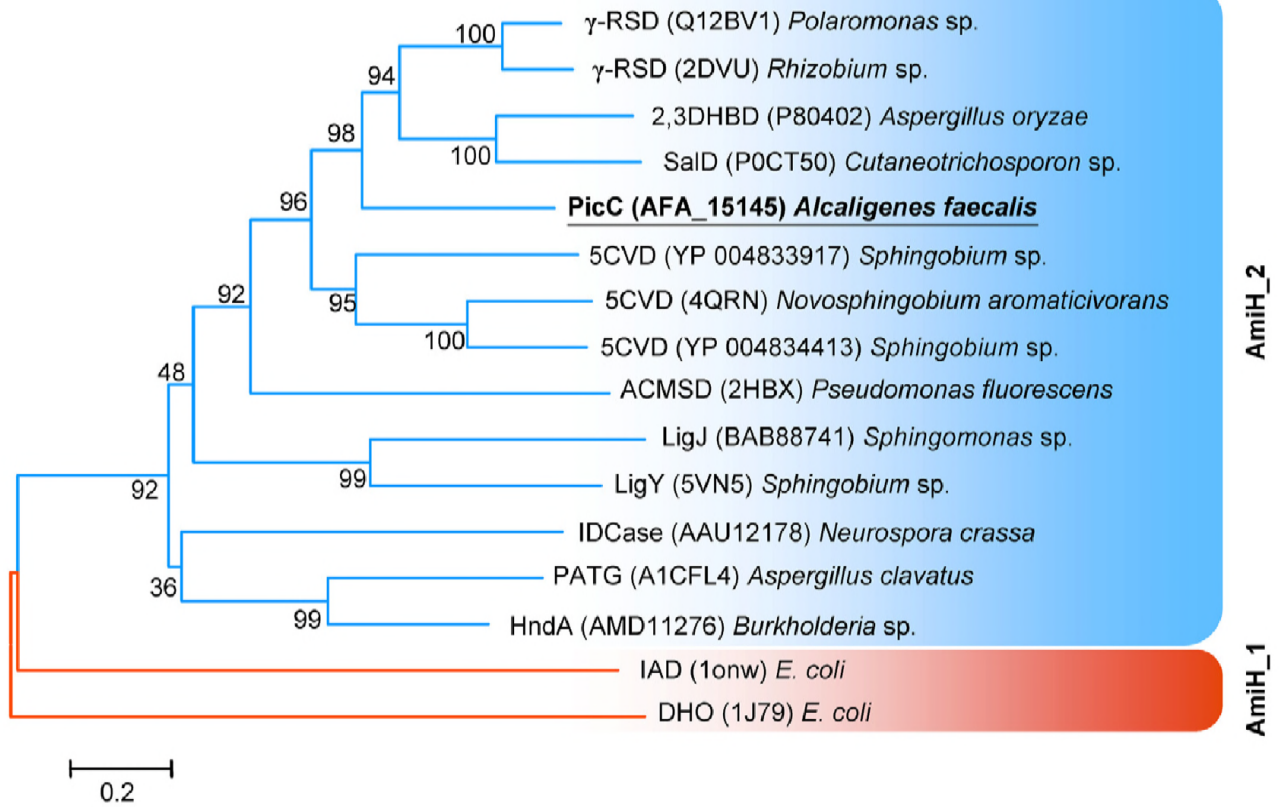

B

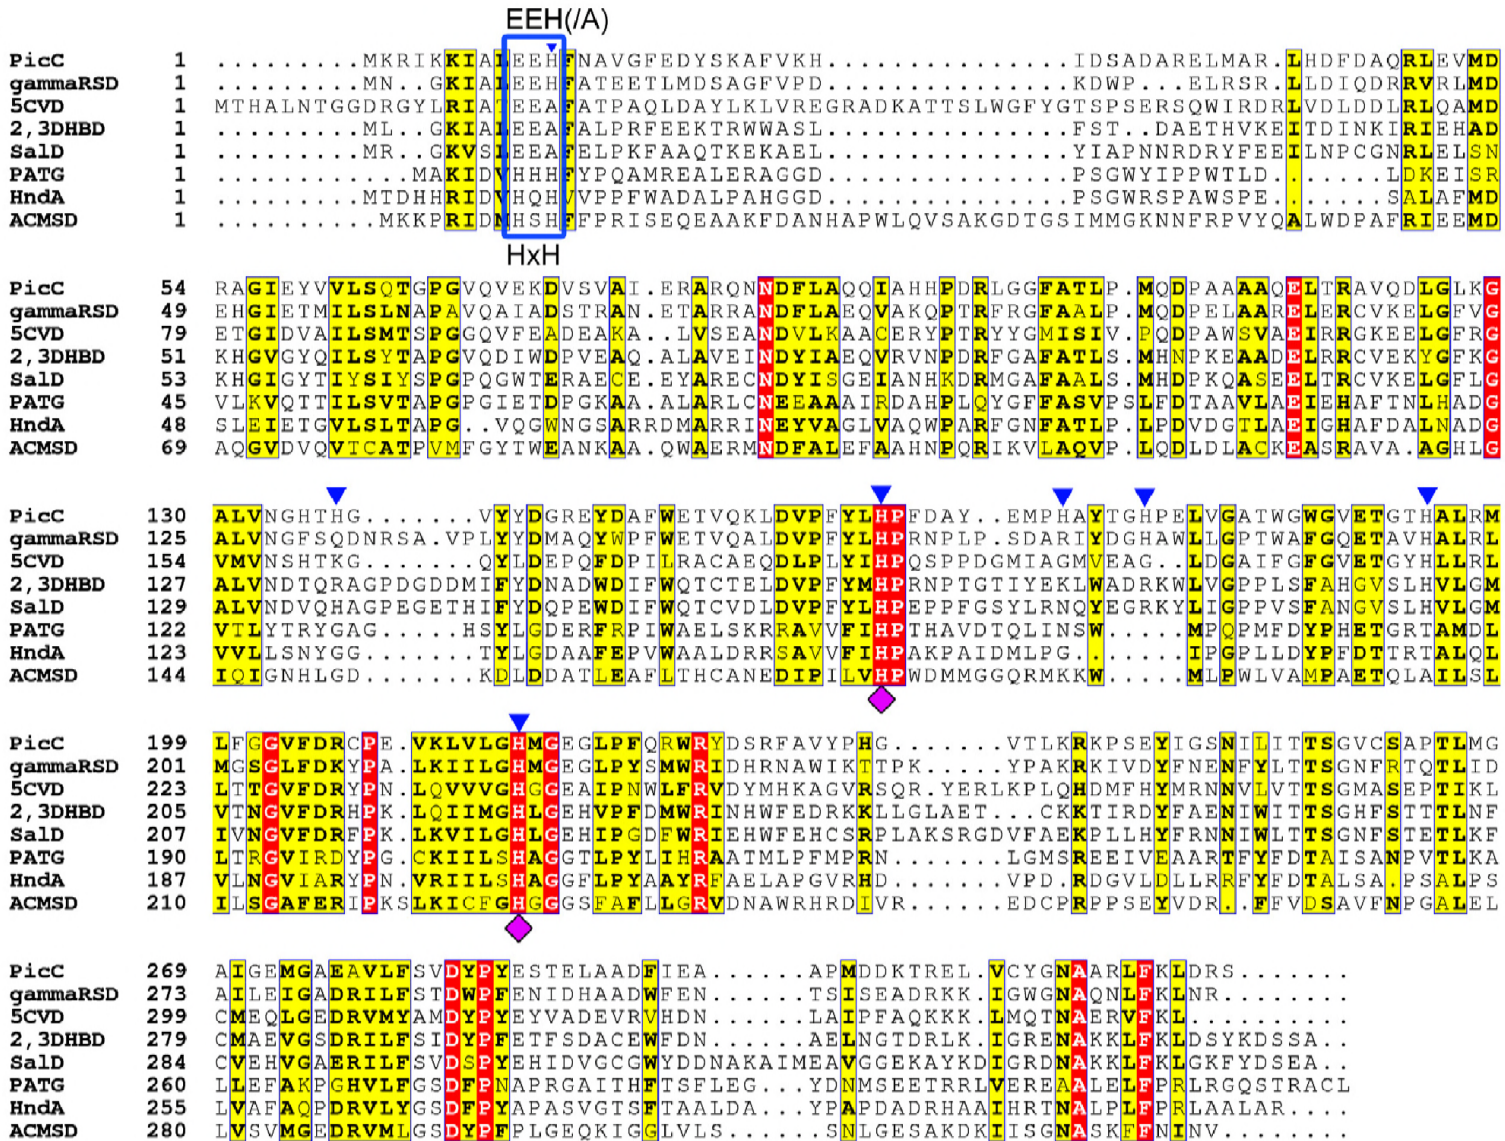

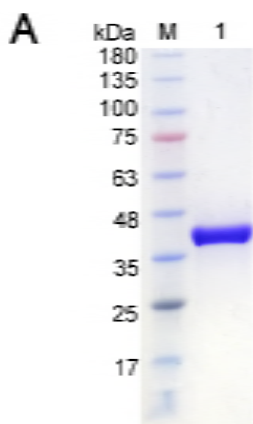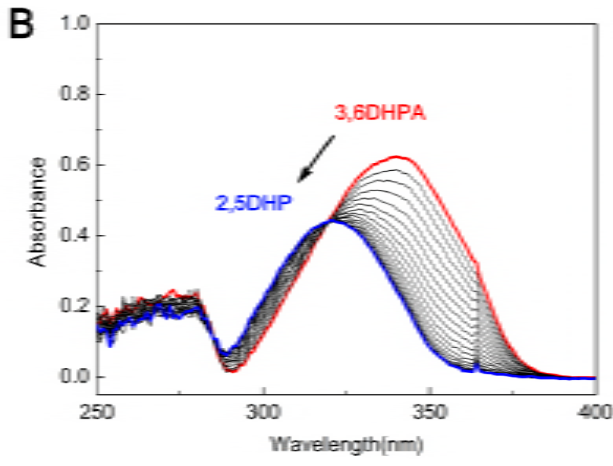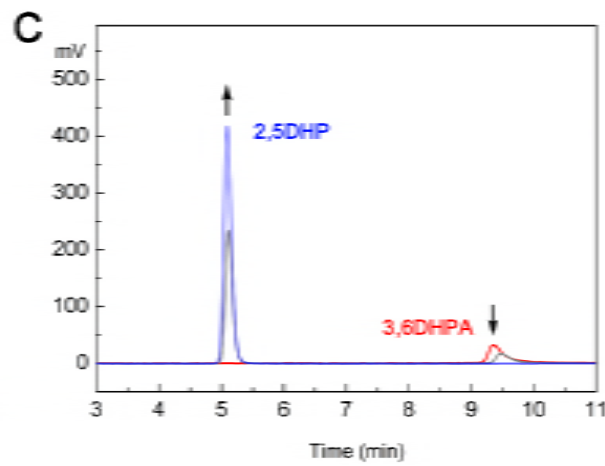

Source: https://www.biorxiv.org/content/10.1101/457895v1.full.pdf
